# Supplementary material for: Neuron-Radial Glial Cell Communication via BMP/Id1 Signaling Is Key to Long-Term Maintenance of the Regenerative Capacity of the Adult Zebrafish Telencephalon
Source: MDPI journal article supplement (doi:10.3390/cells10102794), 2021-10-19
Supplement: s1 [file s1]

## Supplementary figures and legends

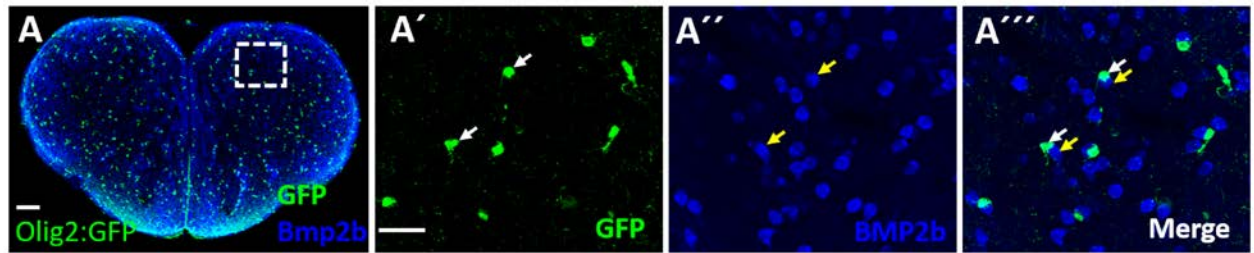

**Figure S1. BMP2b is not detectably expressed in oligodendrocytes of the telencephalon.**

Cross-sections through the telencephalon of *Tg(olig2:gfp)* transgenic fish marking oligodendrocytes (green) were immunostained with a BMP2b antibody (blue). The boxed-in area in A is magnified in A' to A''' showing individual channels (A', A'') and the merged image (A'''). White arrows show 2 oligodendrocytes, yellow arrows show BMP2b+ neurons.

Scale bars: 100  $\mu$ m (A), 20  $\mu$ m (A'-A''').

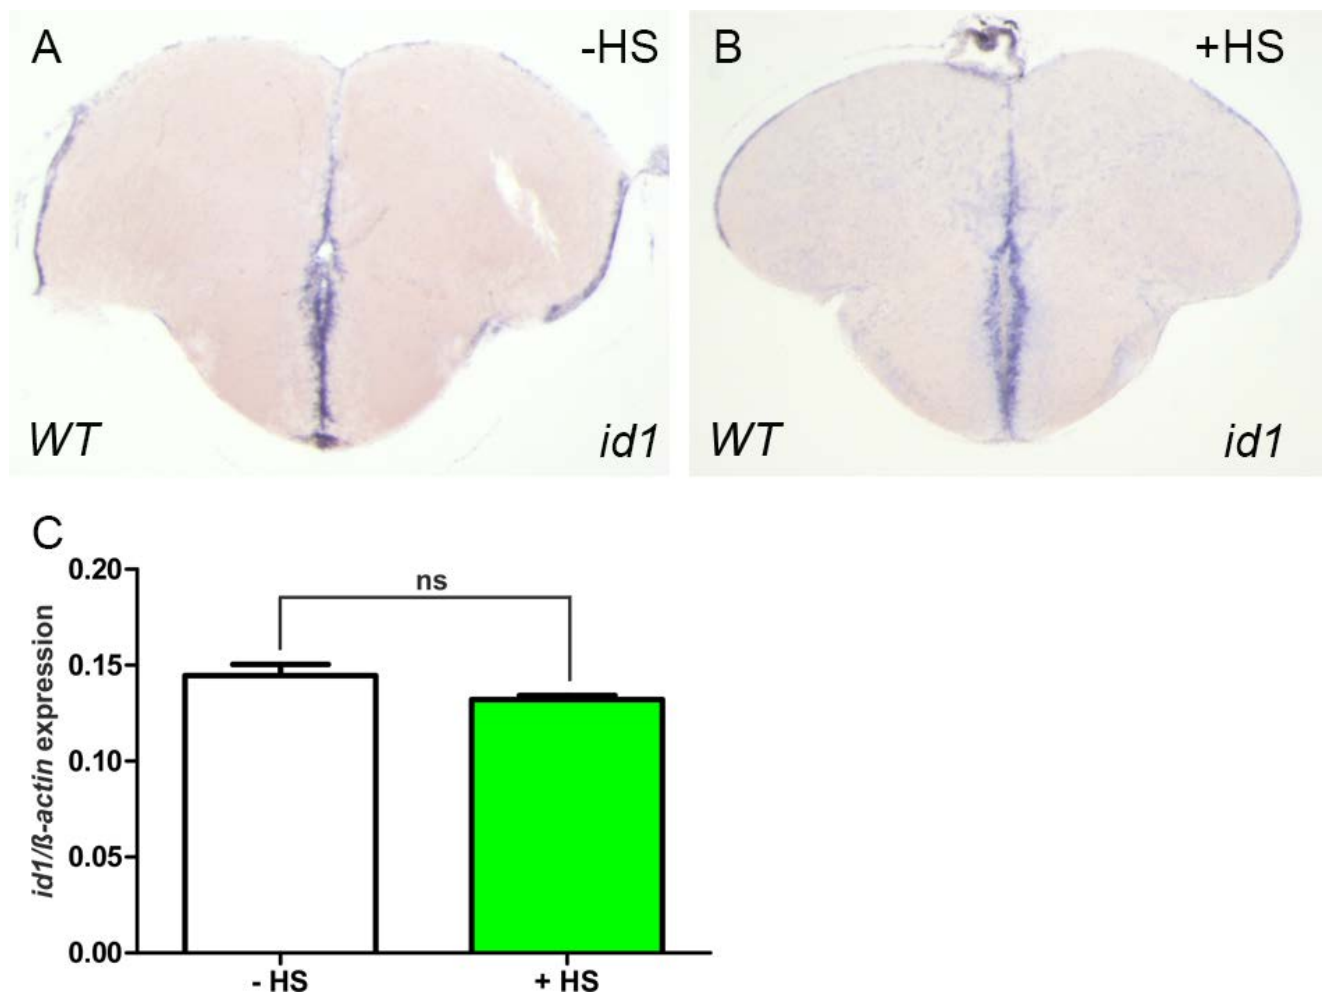

**Figure S2. Heat-shock has no influence on the endogenous expression of the *id1* gene.**

(A-B) ISH against *id1* on cross- sections of WT telencephala. There is no difference in the expression level for *id1* between non heat-shocked (A) and heat-shocked (B) WT brains. (C) RT-qPCR analysis of *id1* mRNA expression levels in WT with and without heat-shock reveals that the level of *id1* mRNA does not change in response to heat-shock in the WT brain. n=3 brains. Significance is indicated by ns, not significant.

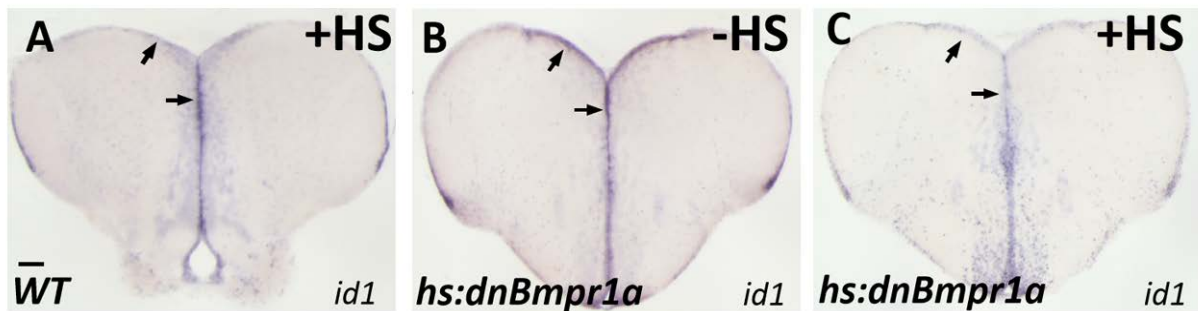

**Figure S3. Heat-shock does not influence the expression pattern of *id1* in WT fish.**

(A-C) Cross-sections through telencephala of heat-shocked WT, (A) and *hs:dnBMPR1a* transgenic animals without (B) and with heat-shock (C). Heat-shock of WT animals did not influence the expression of *id1*. In contrast, decrease of *id1* expression was noted after inhibition of the BMP pathway by heat-shock of *Tg(hs: dnBmpr1a)* animals (C) relative to transgenics without heat-shock (B). Black arrows show the expression of *id1* in the ventricular zone of WT (A) and *Tg(hs:dnBmpr1a)* animals without heat-shock (B) and after heat-shock (C). n=3 animals (A-C). Scale bar: 20  $\mu$ m. HS, heat-shock.

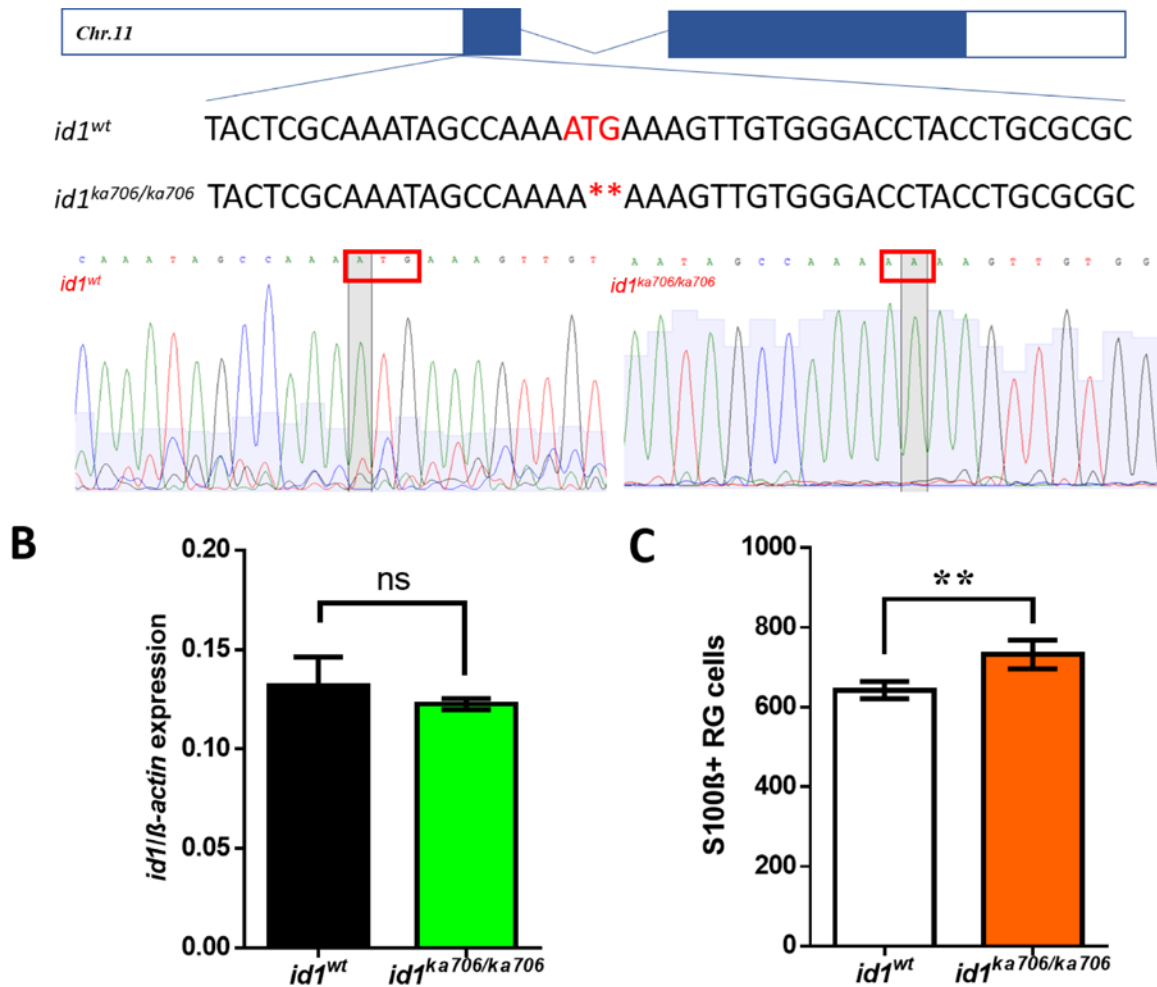

**Figure S4. Generation of a CRISPR/Cas 9-mediated *Id1* loss- of- function mutant *id1*<sup>ka706/ka706</sup>.** (A) Schematic representation of the *id1* locus on chromosome 11. The gene consists of 2 exons. Red letters represent the start codon of the *id1* coding sequence. The Sanger sequencing results of WT (*id1*<sup>WT</sup>) and homozygous (*id1*<sup>ka706/ka706</sup>) sequences are displayed underneath. In the homozygous sequences T and G of the start codon are deleted. (B) RT-qPCR analysis of *id1* mRNA expression levels in WT and *id1*<sup>ka706/ka706</sup> telencephala reveals that the level of *id1* mRNA is not changed in the mutant. (C) Quantification of the S100β+ RGCs/NSCs in WT and *id1*<sup>ka706/ka706</sup> telencephala without injury. n=3 brains (B, C). Significance is indicated by asterisks: ns, not significant; \*\*, *p* < 0.01.

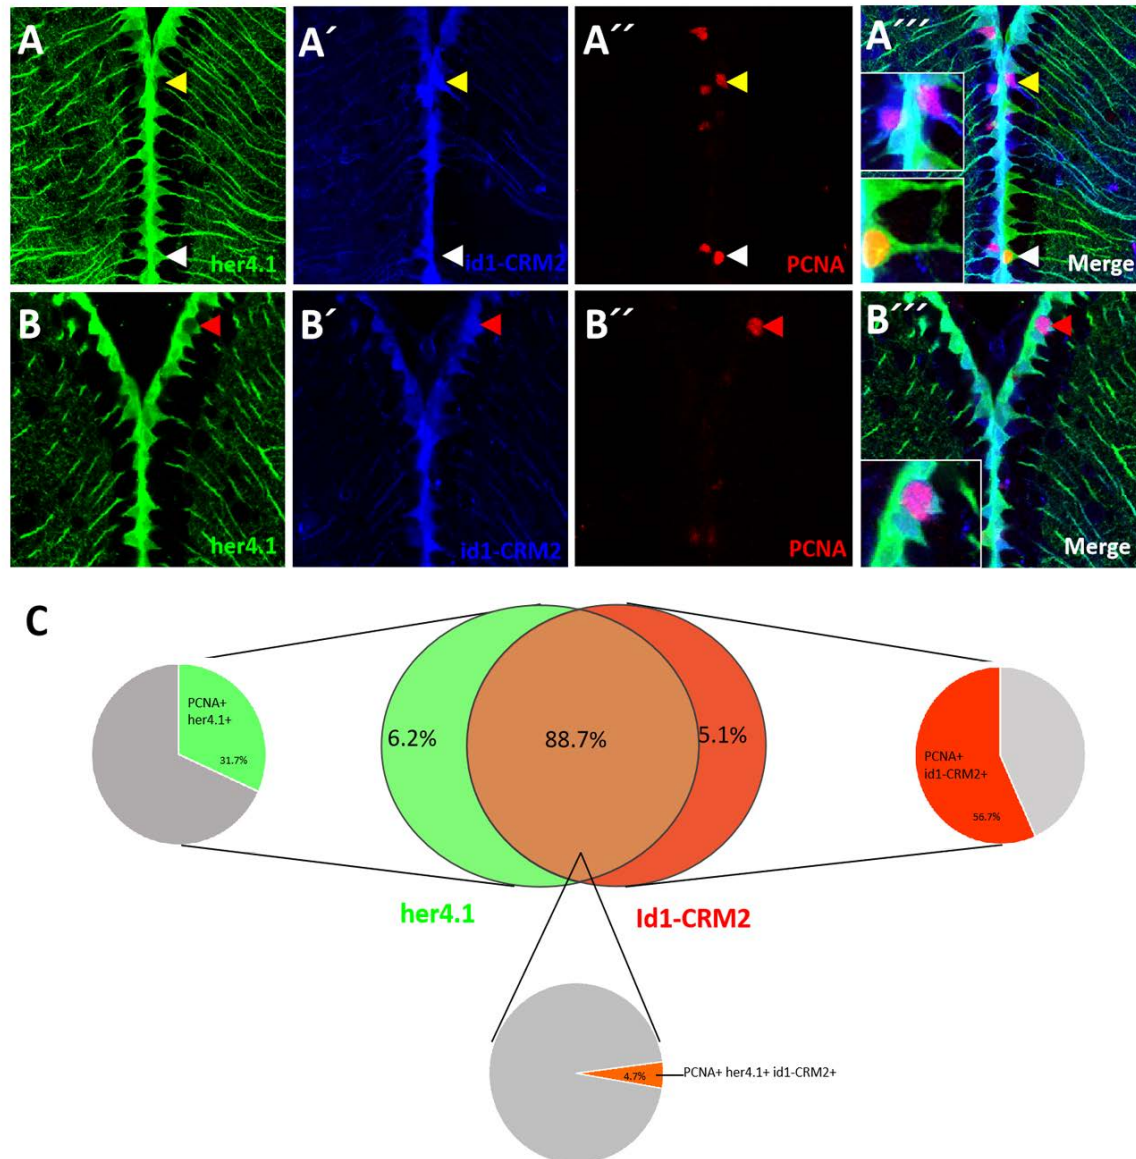

**Figure S5. Both *notch3* and *her4.1* are expressed together with *id1* in the RGCs of the telencephalon.** (A-B''') Immunostaining on cross sections of the telencephalon of *Tg(her4.1:gfp;id1-CRM2:mCherry)* double transgenics with antibodies against GFP (green), mCherry (blue) and the proliferation marker PCNA (red). GFP and mCherry signals co-localize indicating that *her4.1* and *id1* are co-expressed. A''' inset: magnified image of PCNA+/id1-CRM2:mCherry+ cells (yellow arrowhead, upper image) and a PCNA+/her4.1+ cell (white arrowhead, lower image). B''' inset: a magnified view of a PCNA+/id1-CRM2:mCherry+/her4.1:gfp+ cell (red arrowhead). (C) Summary of co-expression analysis of (*Tg(id1-CRM2:mCherry)*, red) and (*Tg(her4.1:gfp)*, green). Pie charts represent total number

of *Tg(her4.1:gfp)* or *Tg(id1-CRM2:mCherry)* or both *Tg(her4.1:gfp)* and *Tg(id1-CRM2:mCherry)* expressing cells and the fraction of cells co-expressing PCNA. Cells expressing either *Tg(id1-CRM2:mCherry)* alone or *Tg(her4.1:gfp)* alone show a higher proportion of PCNA+ cells than cells expressing both markers. Scale bar = 20  $\mu$ m. n=3 brains.

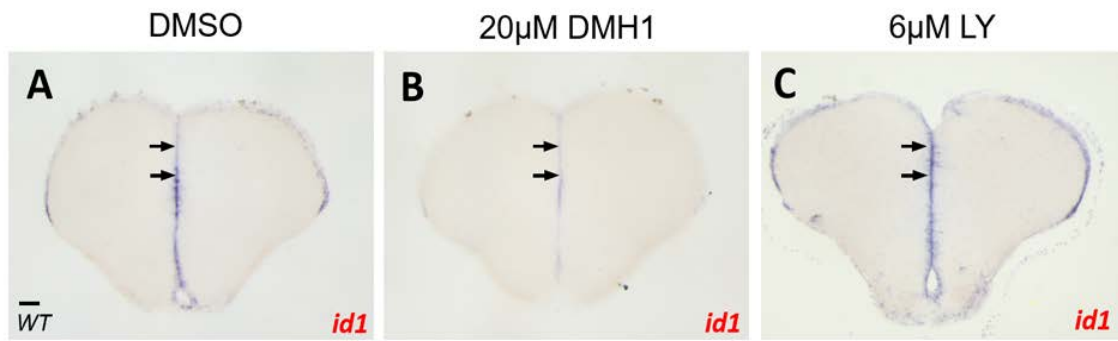

**Figure S6. Expression of *id1* is independent of Notch signaling**

(A-C) Expression of *id1* revealed by ISH on control brains (DMSO, A) or brains treated with different concentrations of DMH1 (B) or LY (C). (B) Inhibition of BMP signaling by 20  $\mu$ M DMH1 lead to the reduction of *id1* expression. (C) Inhibition of Notch signaling by 6  $\mu$ M LY411575 did not influence the expression of *id1* but strongly reduced *her4.1* expression (See Fig, 7C). Black arrows show the expression of *id1* in the ventricular zone of untreated (A) and treated (B and C) adult zebrafish telencephala. n=3 brains. Scale bar: 100  $\mu$ m.

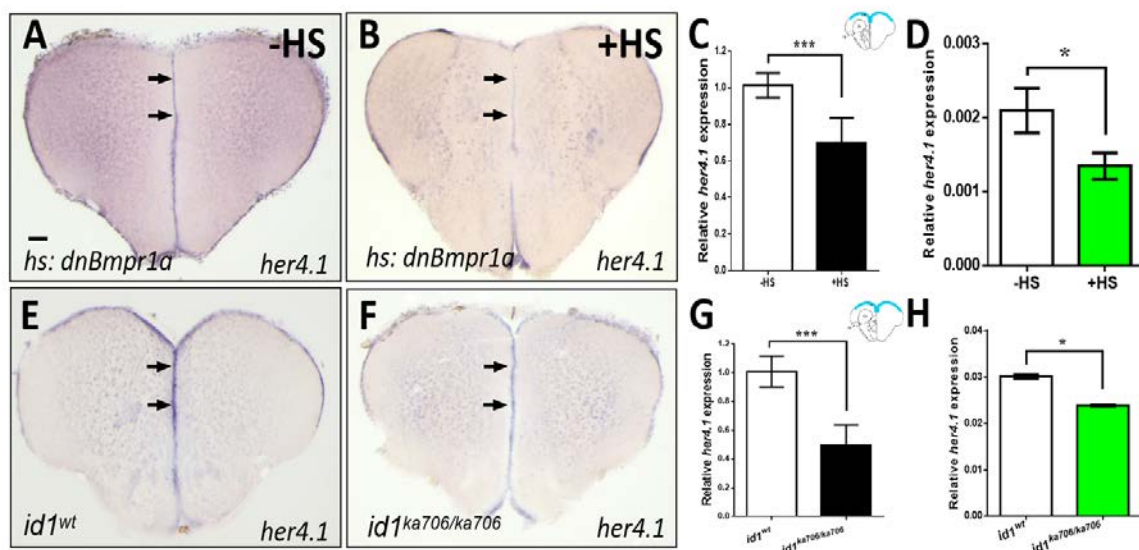



**Figure S7. Inhibition of BMP signaling or deletion of *id1* leads to a reduction of *her4.1* expression.**

(A-B) ISH reveals decrease of *her4.1* expression after inhibition of the BMP pathway by heat-shock of *Tg(hs:dnBmpr1a)* animals. Black arrows show the expression of the *her4.1* gene in the ventricular zone of *Tg(hs:dnBmpr1a)* animals without (A) and with heat-shock (B). (C) Quantification of *her4.1* expression in panels A and B (scheme in the upper right-hand corner displays the quantified area in blue). (D) RT-qPCR quantification of *her4.1* mRNA expression of brains shown in A-B. (E-F) Expression of *her4.1* mRNA is reduced in *id1<sup>ka706/ka706</sup>* telencephala. Black arrows show the region of expression of *her4.1* in the ventricular zone of *id1<sup>ka706/ka706</sup>* mutants and WT siblings. (G) Quantification of *her4.1* expression (scheme in the upper right-hand corner displays the quantified area in blue). (H) RT-qPCR quantification confirms reduction of *her4.1* in *id1<sup>ka706/ka706</sup>* telencephala. HS, heat-shock. n=3 independent brains (C, G), n=15 sections D, H

**Table S1. Genes co-expressed with *id1*+/*ccdn1*- RGCs/NSCs according to single cell sequencing data from (41).**

| Name           | ID                  | Pearson_cor | Function                  | Reference |
|----------------|---------------------|-------------|---------------------------|-----------|
| <i>smad1</i>   | ENSDARG000000027199 | 0.448256850 | signal transducer         | (81)      |
| <i>acvr2b</i>  | ENSDARG000000044422 | 0.379378967 | activin receptor type II  | (82)      |
| <i>smad5</i>   | ENSDARG000000037238 | 0.323494119 | signal transducer         | (81)      |
| <i>bambia</i>  | ENSDARG000000055381 | 0.222851826 | target gene and modulator | (83)      |
| <i>bmpr2b</i>  | ENSDARG000000020057 | 0.191787248 | Bmp type II receptor      | (73)      |
| <i>acvr2aa</i> | ENSDARG000000011188 | 0.181544807 | activin receptor type II  | (82)      |
| <i>bmpr1ab</i> | ENSDARG000000105045 | 0.088841975 | Bmp type I receptor       | (75)      |
| <i>smad9</i>   | ENSDARG000000021938 | 0.061794402 | signal transducer         | (39)      |

**Table S2. Number of WT and *idl*<sup>ka706/ka706</sup> adult zebrafish used in the multiple stab wound experiments.**

|                                   | Start number | Fish sacrificed at 5dpl | Fish sacrificed after second stab injury | Fish survived after 3 months |
|-----------------------------------|--------------|-------------------------|------------------------------------------|------------------------------|
| <i>idl</i> <sup>wt</sup>          | 25           | 2                       | 7                                        | 16                           |
| <i>idl</i> <sup>ka706/ka706</sup> | 25           | 2                       | 7                                        | 11                           |

**Table S3. PCR primer sequences for ISH probes**

|                       |                                 |
|-----------------------|---------------------------------|
| <i>bmp2a</i> Forward  | 5'-ACGCAGAGCAGGTTAGCA-3'        |
| <i>bmp2a</i> Reverse  | 5'- GAAGGGACCGACTTACGC-3'       |
| <i>bmp7a</i> Forward  | 5'-CAGTTGCTGCTGATTTGTTG-3'      |
| <i>bmp7a</i> Reverse  | 5'-TGAACATCTGTGAGGGGATT-3'      |
| <i>bmp7b</i> Forward  | 5'-CAGGTTGTGCGCTCTGGAAACGCAA-3' |
| <i>bmp7b</i> Reverse  | 5'-CCTTTTGAATCCTGGCCAATCG-3'    |
| <i>bmpr2b</i> Forward | 5'- TATTGTGCGCTGTTCTTTG-3'      |
| <i>bmpr2b</i> Reverse | 5'- GCAGATAGGCCAGTCCTCTG-3'     |

**Table S4. Restriction enzymes and RNA polymerases used for DIG probe synthesis:**

| Gene name      | Restriction enzyme | RNA-polymerase |
|----------------|--------------------|----------------|
| <i>idl</i>     | XhoI               | T3             |
| <i>her4.1</i>  | CeuI               | T7             |
| <i>notch3</i>  | ApaI               | SP6            |
| <i>bmp2a</i>   | ApaI               | SP6            |
| <i>bmp2b</i>   | SpeI               | T7             |
| <i>bmp4</i>    | BamHI/SpeI         | T7             |
| <i>bmp7a</i>   | SacII              | SP6            |
| <i>bmp7b</i>   | NcoI               | SP6            |
| <i>bmpr1ab</i> | EcoRI              | T7             |
| <i>bmpr2b</i>  | PstI               | T7             |

**Table S5. PCR primer sequences for RT-qPCR.**

|                       |                                                      |
|-----------------------|------------------------------------------------------|
| <i>β-actin</i> RT Fwd | 5'-GCC TGA CGG ACA GGT CAT-3'                        |
| <i>β-actin</i> RT Rev | 5'-ACC GCA AGA TTC CAT ACCC-3'                       |
| <i>ascl1a</i> RT Fwd  | 5'-ATC TCC CAA AAC TAC TCT AAT GAC ATG AAC TCT AT-3' |
| <i>ascl1a</i> RT Rev  | 5'-CAA GCG AGT GCT GAT ATT TTT AAG TTT CCT TTT AC-3' |
| <i>her4.1</i> RT Fwd  | 5'-GCT GAT ATC CTG GAG ATG ACG-3'                    |
| <i>her4.1</i> RT Rev  | 5'-GAC TGT GGG CTG GAG TGT GTT-3'                    |
| <i>idl</i> RT Fwd     | 5'-ATG TTG TCC GCT GCC TCT-3'                        |
| <i>idl</i> RT Rev     | 5'-GCT GGC TTT CTT GTT GGT C-3'                      |

## References

39. Wei CY, Wang HP, Zhu ZY, Sun YH. Transcriptional factors smad1 and smad9 act redundantly to mediate zebrafish ventral specification downstream of smad5. *J Biol Chem.* 2014;289(10):6604-18.
73. Monteiro R, van Dinther M, Bakkers J, Wilkinson R, Patient R, ten Dijke P, et al. Two novel type II receptors mediate BMP signalling and are required to establish left-right asymmetry in zebrafish. *Dev Biol.* 2008;315(1):55-71.
75. Smith KA, Noel E, Thurlings I, Rehmann H, Chocron S, Bakkers J. Bmp and nodal independently regulate lefty1 expression to maintain unilateral nodal activity during left-right axis specification in zebrafish. *PLoS Genet.* 2011;7(9):e1002289.
81. Muller F, Blader P, Rastegar S, Fischer N, Knochel W, Strahle U. Characterization of zebrafish smad1, smad2 and smad5: the amino-terminus of smad1 and smad5 is required for specific function in the embryo. *Mech Dev.* 1999;88(1):73-88.
82. Albertson RC, Payne-Ferreira TL, Postlethwait J, Yelick PC. Zebrafish acvr2a and acvr2b exhibit distinct roles in craniofacial development. *Dev Dyn.* 2005;233(4):1405-18.
83. Tsang M, Kim R, de Caestecker MP, Kudoh T, Roberts AB, Dawid IB. Zebrafish nma is involved in TGFbeta family signaling. *Genesis.* 2000;28(2):47-57.
